# Supplementary material for: A facile post-process method to enhance crystallinity and electrochemical properties of SnO2/rGO composites with three-dimensional hierarchically porous structure
Source: Royal Society of Chemistry journal article supplement (doi:10.1039/c6ra23236a), 2016-01-01
Supplement: c6ra23236a1.pdf [file c6ra23236a1.pdf]

## Supporting Information

### **A facile post-process method to enhance crystallinity and electrochemical properties of SnO<sub>2</sub>/rGO composites with three-dimensional hierarchically porous structure**

Fei Tian<sup>a</sup>, Xiaobing Wang<sup>\* a</sup>, Zhenyu Chen<sup>a</sup>, Yuming Guo<sup>a</sup>, Huijun Liang<sup>a, b</sup>,  
Zhansheng Lu<sup>c</sup>, Dong Wang<sup>a</sup>, Xiangdong Lou<sup>\*a</sup>, Lin Yang<sup>\* a</sup>

<sup>a</sup> Collaborative Innovation Center of Henan Province for Green Manufacturing of Fine Chemicals, Key Laboratory of Green Chemical Media and Reactions, Ministry of Education, School of Chemistry and Chemical Engineering, Henan Normal University, Xinxiang, Henan 453007, P. R. China; E-mail: yanglin1819@163.com.

<sup>b</sup> College of Chemistry and Chemical Engineering, Xinxiang University, Xinxiang, Henan 453003, P. R. China;

<sup>c</sup> College of Physics and Information Engineering, Henan Normal University, Xinxiang, Henan 453007, P. R. China;

\* Corresponding author. Fax: +86 373 3328507; Tel: +86 373 3325058.

E-mail: wxb95@163.com (X. Wang); yanglin1819@163.com (L. Yang); louxd16@163.com (X. Lou).

S1:

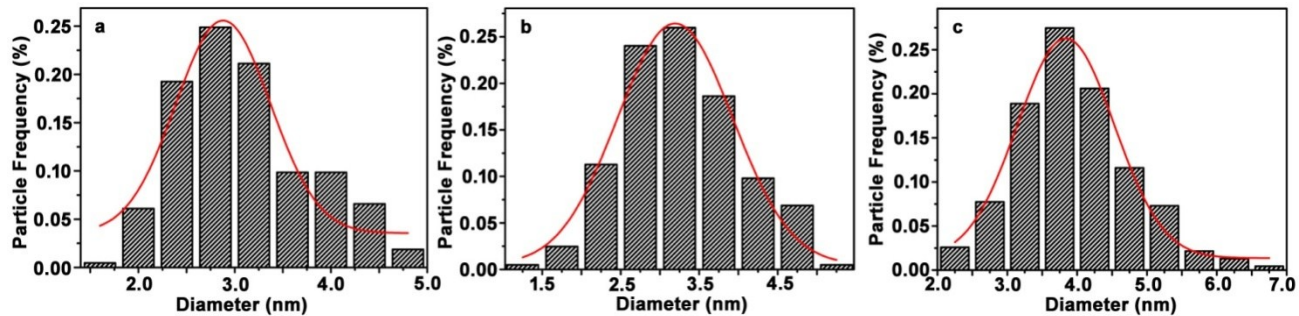

**Fig. S1** The grain size distributions of SnO<sub>2</sub> nanoparticles in the three samples. (a) SnO<sub>2</sub>/rGO, (b) SnO<sub>2</sub>/rGO-120, (c) SnO<sub>2</sub>/rGO-280.

S2:

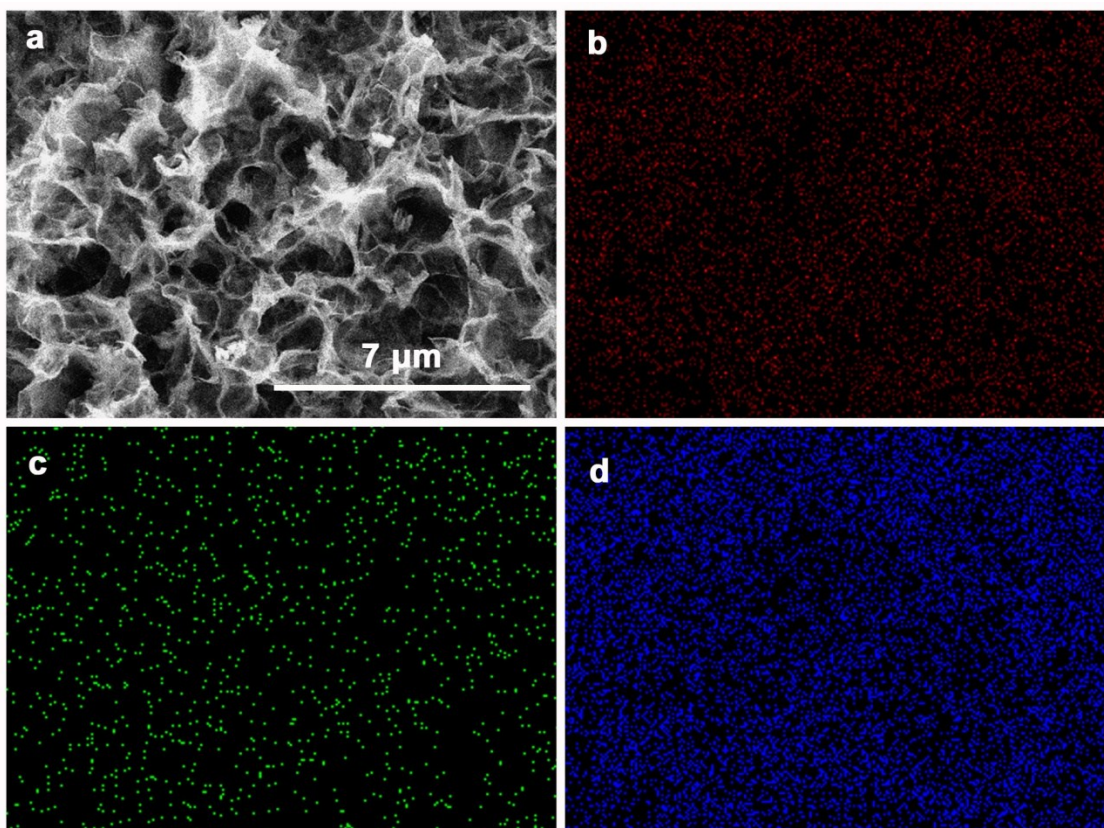

**Fig. S2** Elemental mapping images of SnO<sub>2</sub>/rGO-120. (a) FESEM, (b) C, (c) Sn, (d) O.
